# Supplementary material for: Yeast β-1,3-glucan production by an outer membrane β-1,6-glucanase: process optimization, structural characterization and immunomodulatory activity
Source: Royal Society of Chemistry journal article supplement (doi:10.1039/d1fo02832d), 2022-01-01
Supplement: d1fo02832d1.pdf [file d1fo02832d1.pdf]

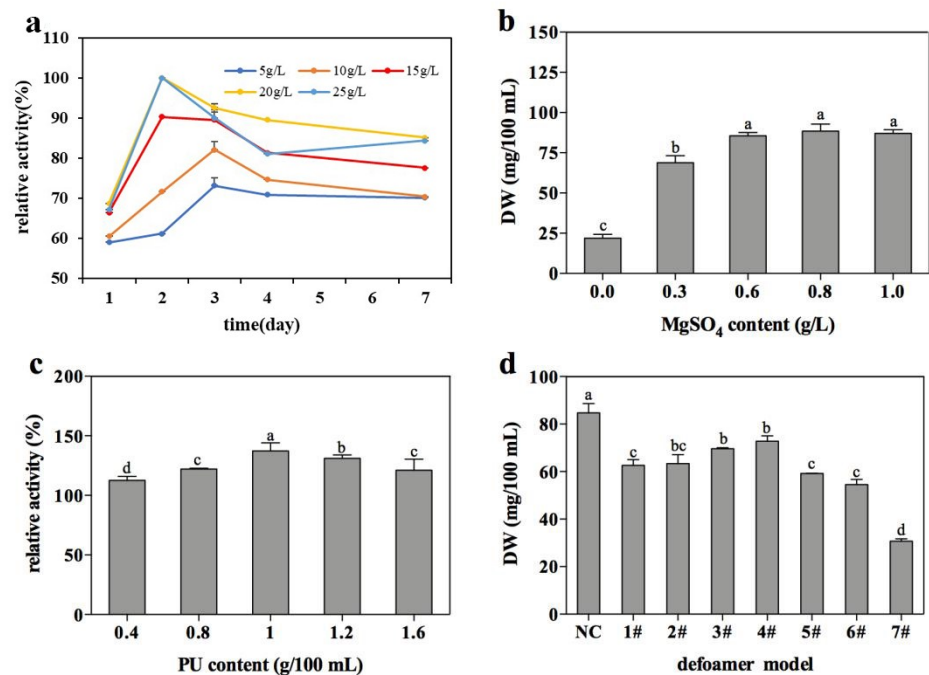

Fig. S1 The optimization of fermentation parameters of strain EGB. The effects of yeast cell content (a) and PU content (c) on the activity of GluM. The effect of MgSO<sub>4</sub> content (b) and various types of defoamers (d) on the biomass of strain EGB (DW, dry weight), 1#, 2#, 3# and 4# are organosilicon-polyether; 5# and 6# are modified organosilicon-polyether; and 7# is polyether-polyol. The values are the means ± SD (n=3).

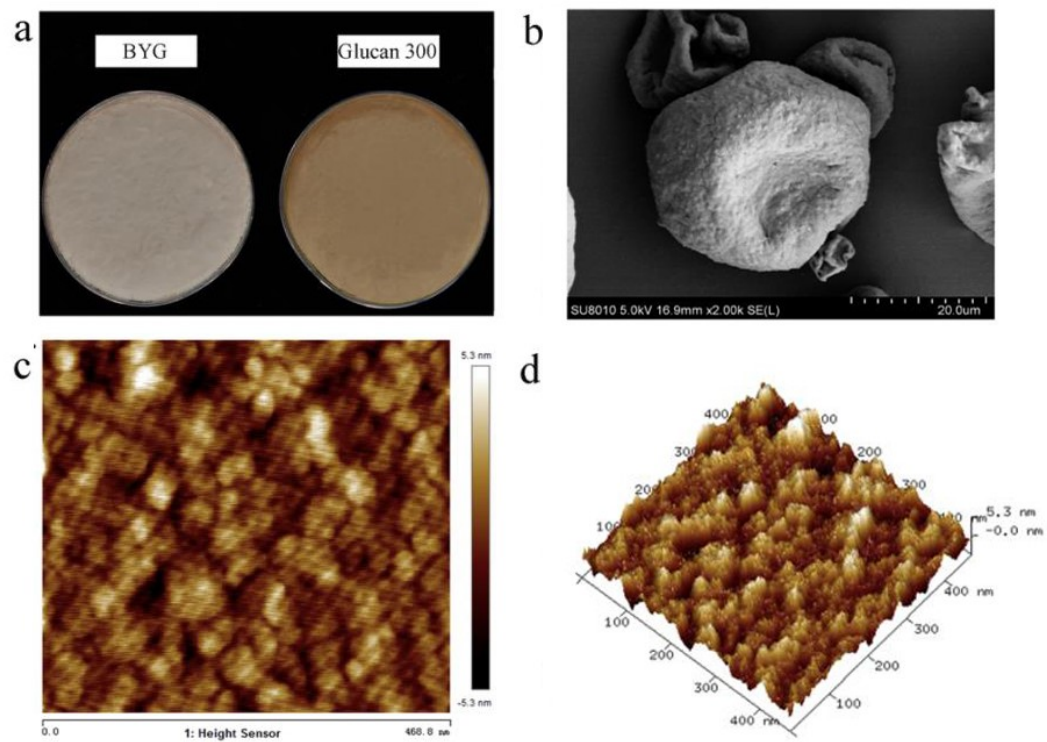

Fig. S2. Macroscopical appearance, SEM and AFM of Glucan 300. (a) Macroscopical appearance of BYG and Glucan 300; (b) SEM of Glucan 300; (c) AFM phase shift of Glucan 300; (d) 3D topography of Glucan 300.

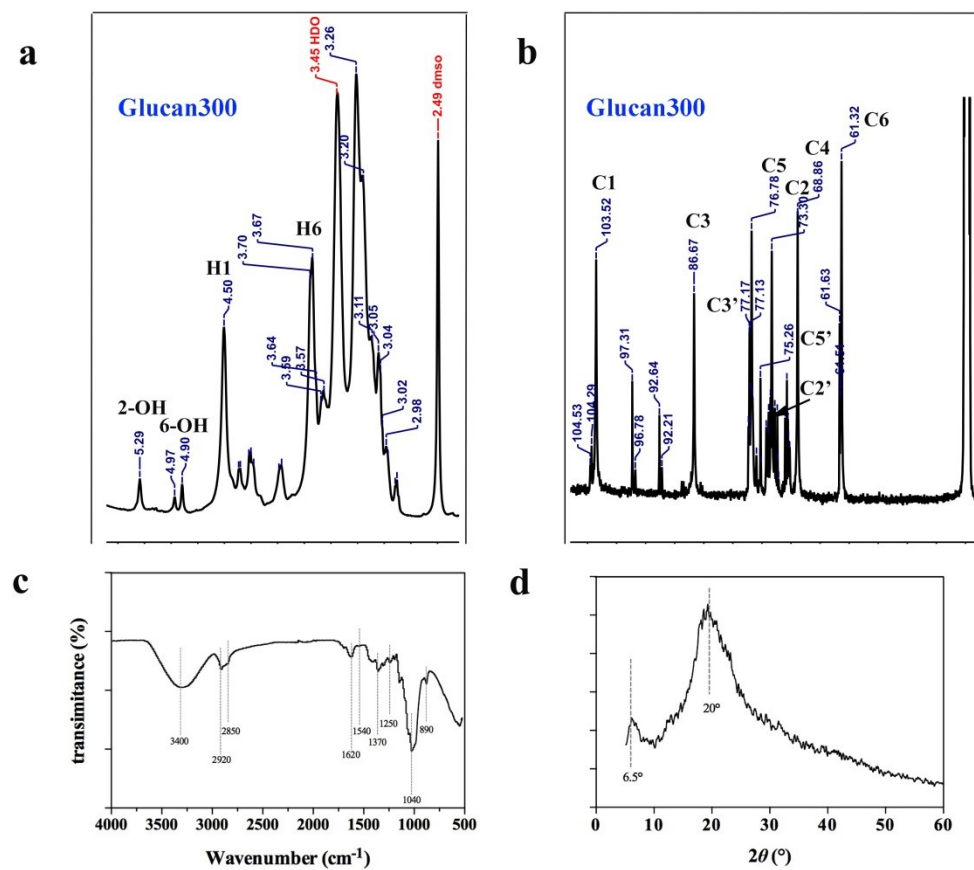

Fig. S3 Structural representation of Glucan 300. <sup>1</sup>H (a) and <sup>13</sup>C (b) NMR spectra, FT-IR (c) and XRD (d) spectrometry measurements of Glucan 300 were performed.

Table S1. Primer sequences used in qRT-PCR

| Primers | Sequences                         |
|---------|-----------------------------------|
| β-actin | Forward: TCGTACCACTGGCATTGTGAT    |
|         | Reverse: CGAAGTCTAGGGCAACATAGCA   |
| IL-1β   | Forward: CACTACAGGCTCCGAGATGAAC   |
|         | Reverse: TCCATCTTCTTCTTTGGGTATTGC |
| IL-6    | Forward: CCCCAATTTCCAATGCTCTCC    |
|         | Reverse: CGCACTAGGTTTGCCGAGTA     |
| IL-10   | Forward: AGCCGGGAAGACAATAACTG     |
|         | Reverse: CATTTCGATAAAGGCTTGG      |
| TNF-α   | Forward: CAAAATTCGAGTGACAAGCCTG   |
|         | Reverse: GAGATCCATGCCGTTGGC       |
| IFN-γ   | Forward: ACAGCAAGGCGAAAAAGGATG    |
|         | Reverse: TGGTGGACCACTCGGATGA      |
| ZO-1    | Forward: TCATCCCAAATAAGAACAGAGC   |
|         | Reverse: GAAGAACAACCCTTTCATAAGC   |

Table S2. The <sup>13</sup>C NMR chemical shifts (ppm) of β-glucan

|            | C-1/1'      | C-2/2'    | C-3/3'    | C-4/4'    | C-5/5'    | C-6/6'    | Reference               |
|------------|-------------|-----------|-----------|-----------|-----------|-----------|-------------------------|
| BYG        | 103.5       | 73.3/73.5 | 86.6/77.1 | 68.8      | 76.7/75.2 | 61.3      | This study              |
| Glucan 300 | 103.5       | 73.3/73.5 | 86.6/77.1 | 68.8      | 76.8/75.2 | 61.3      | This study              |
| BYGlc      | 105.5       | 73.3      | 86.7      | 68.9      | 76.8      | 61.4      | (Cao et al., 2016)      |
| Glucan     | 102.5       | 72.5      | 85.8      | 68.2      | 76.0      | 60.7      | (Freimund et al., 2003) |
| N-glucan   | 103.5       | 73.3      | 86.7/73.9 | 68.8      | 76.8/76.0 | 61.3/70.4 | (Liu et al., 2008)      |
| NG         | 103.0/103.3 | 72.8/73.2 | 86.2/76.5 | 68.4/69.4 | 76.3/75.8 | 60.9/68.1 | (Shi et al., 2014)      |

### Supplementary Reference

- Cao, Y., Zou, S., Xu, H., Li, M., Tong, Z., Xu, M., Xu, X. 2016. Hypoglycemic activity of the Baker's yeast beta-glucan in obese/type 2 diabetic mice and the underlying mechanism. *Mol. Nutr. Food Res.* 60, 2678-2690.
- Freimund, S., Sauter, M., Käppeli, O., Dutler, H. 2003. A new non-degrading isolation process for β-1,3-d-glucan of high purity from baker's yeast *Saccharomyces cerevisiae*. *Carbohydr. Polym.* 54, 159-171.
- Liu, X., Wang, Q., Cui, S., Liu, H. 2008. A new isolation method of β-d-glucans from spent yeast *Saccharomyces cerevisiae*. *Food Hydrocolloids* 22, 239-247.

Shi, F., Shi, J., Li, Y. 2014. Mechanochemical phosphorylation and solubilisation of  $\beta$ -D-glucan from yeast *Saccharomyces cerevisiae* and its biological activities. PLoS One 9, e103494. [https://doi: 10.1371/journal.pone.0103494](https://doi.org/10.1371/journal.pone.0103494).
